# Supplementary material
Source: PubMed Central journal article supplement (PMC1283771)
Supplement: plntphys_pp.105.068064_1.pdf [file plntphys_pp.105.068064_1.pdf]

## SUPPLEMENTAL DATA

(The tables are in one Excel file: Zheng Supplemental Tables)

**Supplemental Table S1.** Genes induced by ABA in wild-type (Ws)

**Supplemental Table S2.** Genes suppressed by ABA in wild-type (Ws)

**Supplemental Table S3.** Genes induced by ABA in *rop10-1*

**Supplemental Table S4.** Genes suppressed by ABA in *rop10-1*

**Supplemental Table S5.** Genes induced by ABA in wild-type (Ws) but not in *rop10-1*

**Supplemental Table S6.** Genes induced by ABA in *rop10-1* but not in wild-type (Ws)

**Supplemental Table S7.** Genes with higher expression in ABA-treated *rop10-1* than in ABA-

treated Ws

**Supplemental Table S8.** Genes commonly activated and repressed by ABA in Ws and *rop10-1*

**Supplemental Table S9.** Primers used in RT-PCR analysis

**Supplemental Figure 1.** Average fold changes in expression of ABA-affected genes in Ws and *rop10-1*. (A) The average fold change for 119 genes determined to be ABA-activated by the 2-fold cut-off in *rop10-1* but not in Ws. (B) The average fold change for 40 genes determined to be ABA-activated in Ws but not in *rop10-1*. “Ws: ABA/CK”, Ws - ABA vs. Ws - control (no ABA); “CK: *rop10*/Ws”, *rop10-1* - control vs. Ws - control; “*rop10*: ABA/CK”, ABA - *rop10-1* vs. control - *rop10-1*. The bar represents SD.
